# Supplementary material for: Circular RNA circSmoc1-2 regulates vascular calcification by acting as a miR-874-3p sponge in vascular smooth muscle cells
Source: PubMed Central journal article supplement — Mol Ther Nucleic Acids. 2021 Dec 22;27:645–55. doi: 10.1016/j.omtn.2021.12.031 (PMC8752879; doi:10.1016/j.omtn.2021.12.031), 2021-12-22
Supplement: mmc1.pdf [file mmc1.pdf]

**Supplemental information**

**Circular RNA circSmoc1-2 regulates vascular  
calcification by acting as a miR-874-3p  
sponge in vascular smooth muscle cells**

**Juhee Ryu, Nakwon Choe, Duk-Hwa Kwon, Sera Shin, Yeong-Hwan Lim, Gwangho Yoon, Ji Hye Kim, Hyung Seok Kim, In-Kyu Lee, Youngkeun Ahn, Woo Jin Park, Hyun Kook, and Young-Kook Kim**

## Supplementary Table 1.

### Expression of circSmoc1-2 in various cell types

circBase was searched to find the expression of circSmoc1-2 in other cell types.

| Organism | Position                        | circRNA ID           | Samples                                                                                                               | Best transcript        | Gene symbol | circRNA study             |
|----------|---------------------------------|----------------------|-----------------------------------------------------------------------------------------------------------------------|------------------------|-------------|---------------------------|
| Human    | chr14:<br>70442431-<br>70461197 | hsa_circ_<br>0032358 | Hepg2, A549,<br>diencephalon,<br>cerebellum,<br>occipital_lobe,<br>frontal_cortex,<br>parietal_lobe,<br>temporal_lobe | NM_001034852           | SMOC1       | Rybak2015,<br>Salzman2013 |
| Mouse    | chr12:<br>82236762-<br>82253740 | mmu_circ_<br>0004229 | forebrain,<br>hindbrain,<br>PN_D07,<br>PN_D21                                                                         | ENSMUST0000<br>0110347 | Smoc1       | Rybak2015                 |

## Supplementary Table 2.

### Protein coding potential of circSmoc1-2

circRNADb was utilized to assess the protein-coding potential of circSmoc1-2. Absence of open reading frame or R score<1.6 denotes poor protein-coding potential.

| circRNADb          |                                                       |          |                       |
|--------------------|-------------------------------------------------------|----------|-----------------------|
| Circ ID            | hsa_circ_21776 (Transcript ID: NM_001034582)          |          |                       |
| Location (hg19)    | chr14 : 70442431-70461197                             |          |                       |
| Gene Symbol        | Smoc1                                                 |          |                       |
| IRES Elements      | Parameter Index                                       |          |                       |
|                    | Position (start--end)                                 | R Score  | With Pseudoknot (Y/N) |
|                    | 34--170                                               | 1.608008 | Y                     |
|                    | 21--172                                               | 1.364798 | Y                     |
| Open Reading Frame | None (Protein length less than 100aa)                 |          |                       |
| Protein Features   | The possibility of encoding protein is relatively low |          |                       |

### Supplementary Table 3.

**PCR primer** The PCR primer sequences for circRNA and mRNA.

| Name of Primer        | Sequence (5'→3')                   |
|-----------------------|------------------------------------|
| circSmoc1-2_rat_Fwd   | CTG CAC GGA CGA GCC ACT GAT G      |
| circSmoc1-2_rat_Rev   | CAC AGC CCC TAC CTT ATG GAT TAA GC |
| circSmoc1-2_mouse_Fwd | CTG CAC GGA AGA ACC ACT GAT G      |
| circSmoc1-2_mouse_Rev | CAC AGC CCC CAC CTT ATG GAT TA     |
| circSmoc1-2_human_Fwd | CTG CAC AGA AGA GCC ACT GAT G      |
| circSmoc1-2_human_Rev | CAC AGC CCC AAC TCT ATG GAT TAA AC |
| Smoc1_mRNA_rat_Fwd    | GTG CAG TGT CAT ACG TAC AC         |
| Smoc1_mRNA_rat_Rev    | CTG AAT TTC TTA CAT TGG TGT TAT TC |
| Adam19_rat_Fwd        | GGC AAA GGC TTG AAT GGC AA         |
| Adam19_rat_Rev        | ATA GCA CCA GGA CTG CCA AC         |
| Adam19_mouse_Fwd      | AGG ACT GGG CCC TTC AGT TT         |
| Adam19_mouse_Rev      | AGC CAC CAG GTA AAG CTC CA         |
| Adam19_human_Fwd      | ATG GGC CAC AAC TTT GGC AT         |
| Adam19_human_Rev      | ATG ATG CAC CCA CCA TCA GC         |
| Runx2_mouse_Fwd       | TGG GAC TGT GGT TAC CGT CA         |
| Runx2_mouse_Rev       | CTC CGG CCC ACA AAT CTC AG         |
| Alpl_mouse_Fwd        | CAA CCT GAC TGA CCC TTC GC         |
| Alpl_mouse_Rev        | CAG AGC CTG CTT GGC CTT AC         |
| Pre-Gapdh_rat_Fwd     | CCA TGG TGC AGC GAT GCT TT         |
| Pre-Gapdh_rat_Rev     | ACG GCC AAA TCT GAG GCA AG         |
| Gapdh_rat_Fwd         | GTA TCG GAC GCC TGG TTA C          |
| Gapdh_rat_Rev         | CTT GCC GTG GGT AGA GTC AT         |
| ActinB_mouse_Fwd      | CTG TAT TCC CCT CCA TCG TG         |
| ActinB_mouse_Rev      | AGC TCA TTG TAG AAG GTG TGG        |

**Cloning primer** The PCR primer sequences for cloning to construct circSmoc1-2 overexpression vector. Uppercase letters denote nucleotide sequence of circSmoc1-2, while lowercase letters indicate vector sequence and enzyme sites. Restriction enzyme sites are underlined.

| Name of Primer    | Sequence (5'→3')                                        |
|-------------------|---------------------------------------------------------|
| Smoc1-2_rat_Fwd   | tttatgcagaa <u>attaattaa</u> GTGCAGTGTTCATACGTAC        |
| Smoc1-2_rat_Rev   | gaatacttacgct <u>ccg</u> cg CTGAATTTCTTACATTGG          |
| Smoc1-2_human_Fwd | tttatgcagaa <u>attaattaa</u> GTGCAGTGCCATACTTACAC       |
| Smoc1-2_human_Rev | gaatacttacgct <u>ccg</u> cg CTGAATTTCTTATGTTGGTGTGTTGTC |

**siRNA sequence** The siRNA sequences to inhibit circSmoc1-2 and Adam19, respectively.

| Name of siRNA                  | Sequence (5'→3')      |
|--------------------------------|-----------------------|
| siircSmoc1-2_1_rat_sense       | AAAUUCAGGUGCAGUGUCUUU |
| siircSmoc1-2_1_rat_antisense   | UGACACUGCACCUGAAUUUUU |
| siircSmoc1-2_2_rat_sense       | AGAAAUUCAGGUGCAGUUUUU |
| siircSmoc1-2_2_rat_antisense   | ACACUGCACCUGAAUUUCUUU |
| siircSmoc1-2_1_human_sense     | AAAUUCAGGUGCAGUGCCUUU |
| siircSmoc1-2_1_human_antisense | UGGCACUGCACCUGAAUUUUU |
| siAdam19_1_human_sense         | GGAGGGAGCUGGACAGGUAUU |
| siAdam19_1_human_antisense     | UACCUGUCCAGCUCCCUCCUU |

**A** Ca<sup>2+</sup> content after adding miR-874-3p

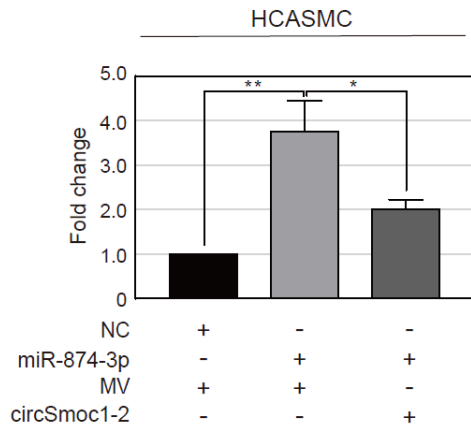

**B** Ca<sup>2+</sup> content after inhibiting Adam19

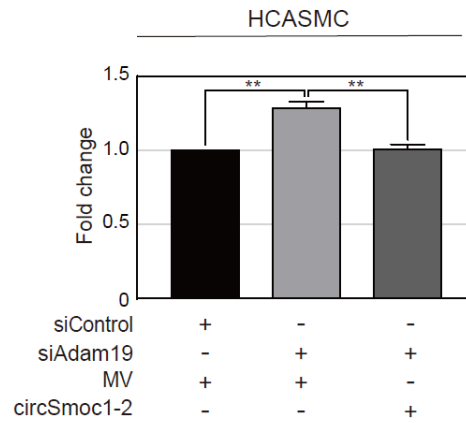

**C** Verification of circSmoc1-2/miR-874-3p/Adam19 axis in CVD model

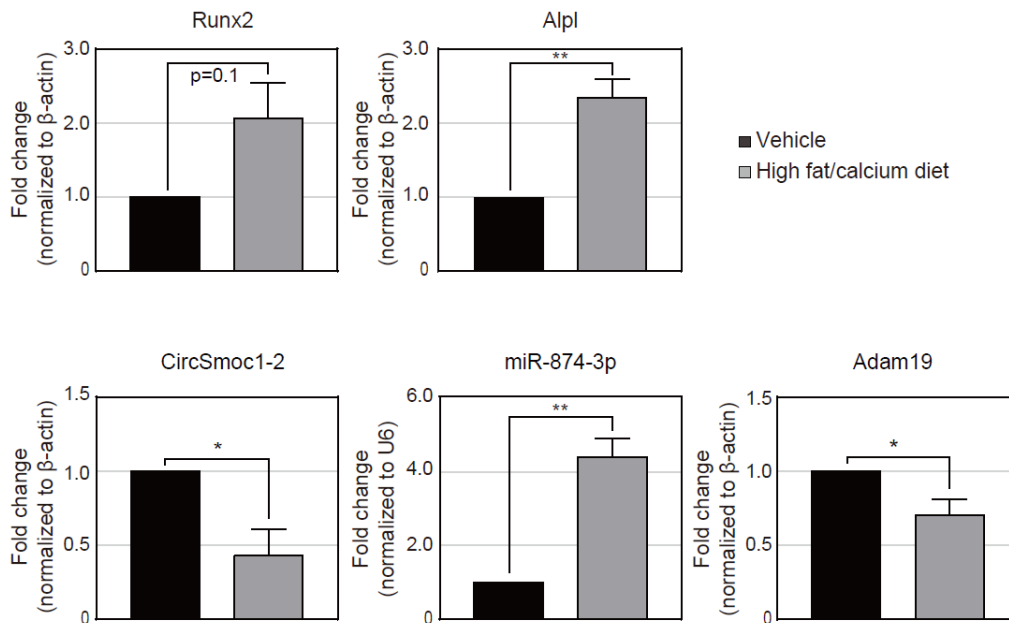

**Supplementary Figure 1. Verification of circSmoc1-2/miR-874-3p/Adam19 regulatory axis in human coronary artery vascular smooth muscle cells (HCASMCs) and vascular calcification (VC) *in vivo* model.** (A) Calcium concentrations (mg Ca/mg protein) after addition of miR-874-3p in HCASMCs (n=3) (B) Calcium concentration (mg Ca/mg protein) after Adam19 inhibition in HCASMCs (n=3). Cells were treated with 2 mM Pi and then cultured for an additional three days post transfection. NC indicates negative control siRNA, while MV means mock Laccase2 vector without insert. (C) Expression levels of calcification

markers and circSmoc1-2/miR-874-3p/Adam19 axis in an VC *in vivo* model (n=3). High fat/calcium diet was fed to *ApoE* KO mice for 8 weeks to induce VC. Then total RNA was isolated from mouse aorta and was used for quantitative real time PCR. Calcification markers, Runx2 and Alpl, were upregulated in *ApoE* KO mice with high fat/calcium diet. CircSmoc1-2 and Adam19 was downregulated, while miR-874-3p was upregulated in the *in vivo* VC model. Expression of calcification markers, circSmoc1-2, and Adam19 were normalized against  $\beta$ -actin, while expression of miR-874-3p was normalized against U6. Data represent the mean  $\pm$  SEM. Statistical significance was determined using the Student's t-test. \*:  $p \leq 0.05$ , \*\*:  $p \leq 0.01$ .

Protein levels after suppression of circSmoc1-2 in VC model

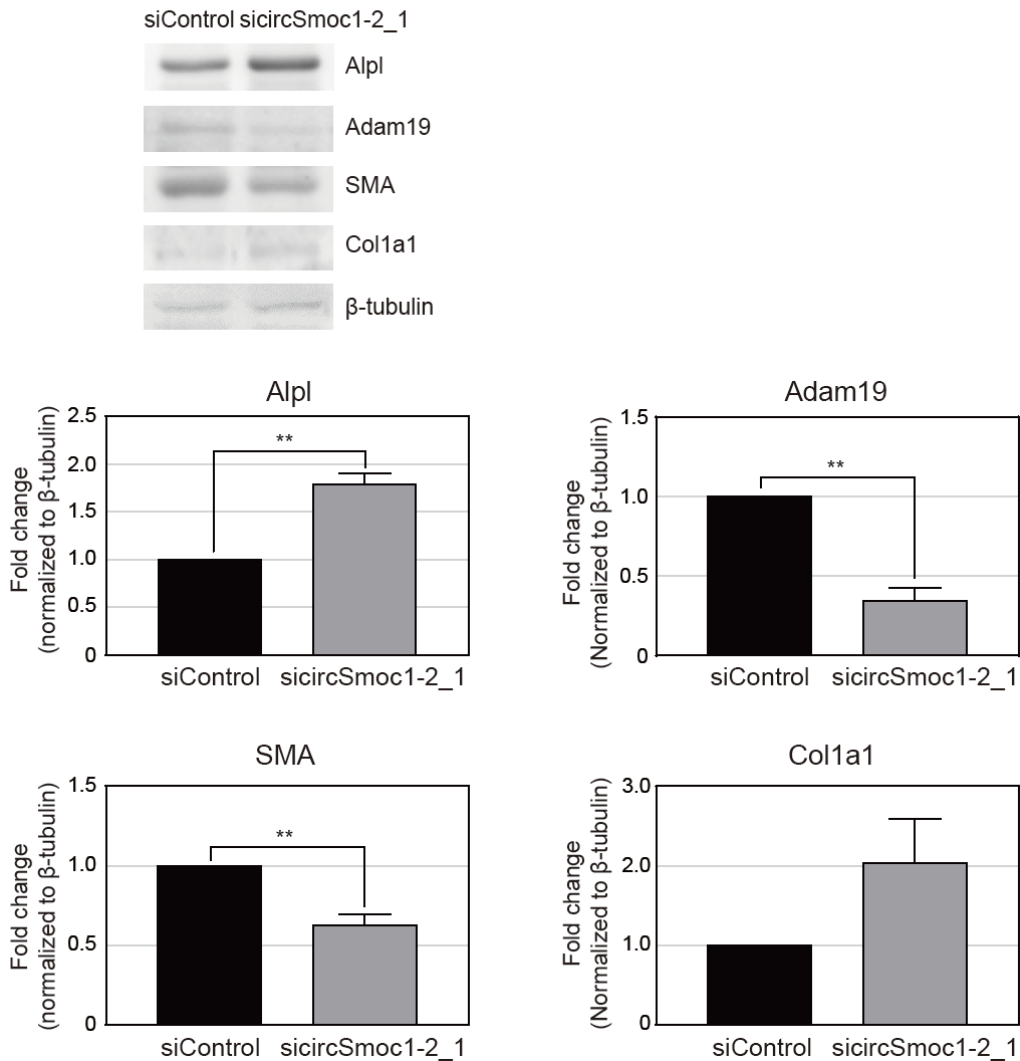

**Supplementary Figure 2. Confirmation of protein levels of Adam19, smooth muscle actin, and collagen marker after inhibition of circSmoc1-2.** A10 cells were transfected with negative control siRNA or sicircSmoc1-2\_1. Then cells were treated with 2 mM Pi and cultured for an additional three days post transfection. Alpl, a calcification marker, was evaluated to assess VC induction. Col1a1 was used as a collagen marker. Protein expression levels were normalized against  $\beta$ -tubulin (n=3). Data represent the mean  $\pm$  SEM. Statistical significance was determined using the Student's t-test. \*\*:  $p \leq 0.01$ .



**A** Conservation in other species

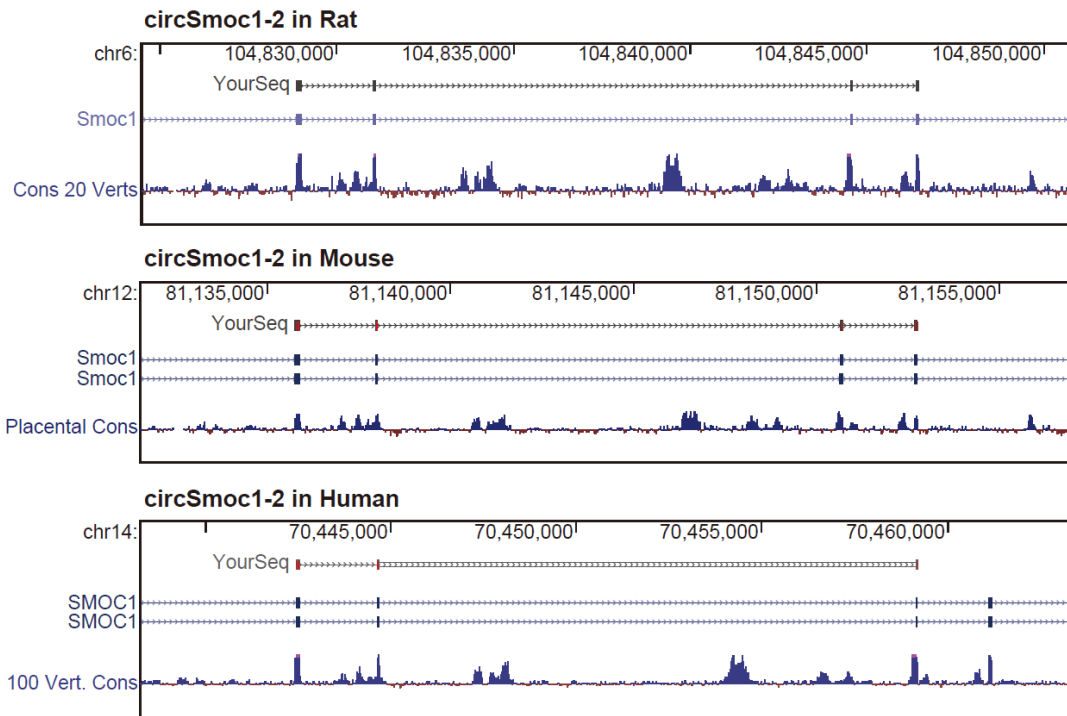

**B** Verification of circSmoc1-2 in human coronary artery smooth muscle cells

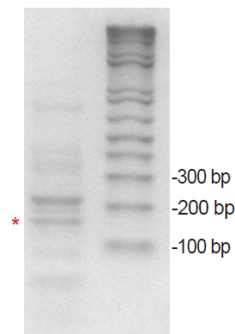

**Supplementary Figure 3. Conservation of circSmoc1-2 in humans and mice (A)** The circSmoc1-2 locus in the human, mouse, and rat genomes is depicted in a screenshot modified from the UCSC genome browser (<http://genome.ucsc.edu/>) **(B)** Confirmation of circSmoc1-2 expression using RT-PCR in human coronary artery smooth muscle cells. The red asterisk (\*) indicates the expected size for circSmoc1-2, which was verified by Sanger sequencing.
